# Supplementary material
Source: PubMed Central journal article supplement (PMC5562020)
Supplement: NIHMS864885-supplement-1.pdf [file NIHMS864885-supplement-1.pdf]

## Supplementary Material

|                       | <b>Title</b>                                                                                                                   | <b>Page</b> |
|-----------------------|--------------------------------------------------------------------------------------------------------------------------------|-------------|
| Supplementary Table 1 | SNPs associated with HTGC in the GOLD GWAS, and their associations with HTGC in the Dallas Heart Study.                        | 2           |
| Supplementary Table 2 | Baseline characteristics of cirrhosis cases and controls in the Copenhagen Cohort                                              | 3           |
| Supplementary Table 3 | Associations of 30 known adiposity-associated SNPs with BMI and HTGC in the Dallas Heart Study.                                | 4           |
| Supplementary Table 4 | Metabolic traits associated with body mass index in the Dallas Heart Study.                                                    | 5           |
| Supplementary Table 5 | Gene $\times$ adiposity interaction on adiposity-related traits in the Dallas Heart Study.                                     | 7           |
| Supplementary Table 6 | Replication of gene $\times$ adiposity interactions on plasma triglyceride levels in the Dallas Biobank and Copenhagen Cohort. | 9           |
|                       | Supplementary References                                                                                                       | 10          |

**Supplementary Table 1. SNPs associated with hepatic TG in the GOLD GWAS, and their associations with HTGC in the Dallas Heart Study.**

| <b>Gene</b> | <b>SNP</b> | <b>Gold P-value</b> | <b>DHS P-value</b> |
|-------------|------------|---------------------|--------------------|
| PNPLA3      | rs738409   | 4.30E-34            | 1.73E-18           |
| TM6SF2 *    | rs58542926 | 1.22E-11            | 3.11E-07           |
| GCKR        | rs780094   | 2.56E-04            | 0.0032             |
| PPP1R3B     | rs4240624  | 3.68E-18            | 0.7886             |
| LYPLAL1     | rs12137855 | 1.06E-04            | 0.9627             |

\* The SNP rs22286030, which is in high linkage disequilibrium with TM6SF2 rs58542926, was reported in the GOLD GWAS.

**Supplementary Table 2. Baseline characteristics of cirrhosis cases and controls in the Copenhagen Cohort.**

| <b>Trait</b>                                | <b>Cirrhosis cases</b> | <b>Controls</b> | <b>P</b> |
|---------------------------------------------|------------------------|-----------------|----------|
| N, (%)                                      | 384 (0.4)              | 93,335 (99.6)   | -        |
| Male, (%)                                   | 251 (65)               | 41,724 (45)     | <0.001   |
| Age, y                                      | 62 (55-69)             | 58 (48-67)      | <0.001   |
| Body mass index (kg/m <sup>2</sup> ), (IQR) | 27 (24-30)             | 26 (23-28)      | <0.001   |
| Heavy alcohol consumption                   | 134 (35)               | 15,562 (17)     | <0.001   |

Values are number and (percentage) or median (interquartile range). Heavy alcohol consumption was defined as self-reported consumption of >21/14 units alcohol per week in males/females.

**Supplementary Table 3. Associations of 30 known adiposity-associated SNPs with BMI and HTGC in the Dallas Heart Study.**

| SNP        | Weight | Beta (BMI) | P (BMI) | Beta(HTGC <sup>0.3</sup> ) | P (HTGC) |
|------------|--------|------------|---------|----------------------------|----------|
| rs1558902  | 0.0851 | 0.448      | 0.12    | -0.008                     | 0.78     |
| rs2867125  | 0.0681 | 0.264      | 0.47    | 0.029                      | 0.40     |
| rs571312   | 0.0557 | 0.610      | 0.08    | 0.061                      | 0.06     |
| rs11847697 | 0.0554 | 0.736      | 0.25    | 0.053                      | 0.37     |
| rs13107325 | 0.0512 | -0.377     | 0.51    | -0.110                     | 0.04     |
| rs543874   | 0.0470 | -0.455     | 0.19    | -0.051                     | 0.12     |
| rs10767664 | 0.0445 | 0.564      | 0.11    | 0.069                      | 0.04     |
| rs12444979 | 0.0435 | 0.092      | 0.82    | 0.036                      | 0.34     |
| rs10938397 | 0.0423 | 0.098      | 0.73    | 0.035                      | 0.19     |
| rs987237   | 0.0418 | 0.887      | 0.02    | 0.071                      | 0.04     |
| rs9816226  | 0.0405 | 0.270      | 0.49    | 0.015                      | 0.68     |
| rs2287019  | 0.0370 | 0.256      | 0.49    | 0.030                      | 0.38     |
| rs2815752  | 0.0351 | -0.134     | 0.65    | 0.026                      | 0.35     |
| rs2241423  | 0.0347 | -0.088     | 0.79    | -0.038                     | 0.22     |
| rs7359397  | 0.0325 | 0.558      | 0.05    | 0.017                      | 0.52     |
| rs713586   | 0.0309 | 0.584      | 0.04    | 0.018                      | 0.50     |
| rs7138803  | 0.0303 | 0.165      | 0.56    | 0.061                      | 0.02     |
| rs13078807 | 0.0260 | 0.443      | 0.21    | -0.011                     | 0.75     |
| rs4771122  | 0.0258 | -0.478     | 0.15    | -0.050                     | 0.11     |
| rs10968576 | 0.0257 | -0.592     | 0.05    | -0.009                     | 0.76     |
| rs3817334  | 0.0256 | -0.007     | 0.98    | 0.031                      | 0.25     |
| rs3810291  | 0.0249 | 0.103      | 0.74    | -0.017                     | 0.55     |
| rs887912   | 0.0242 | 0.887      | 0.01    | 0.012                      | 0.70     |
| rs2112347  | 0.0241 | 0.022      | 0.94    | 0.031                      | 0.26     |
| rs1514175  | 0.0240 | 0.454      | 0.11    | 0.065                      | 0.01     |
| rs29941    | 0.0224 | 0.248      | 0.40    | -0.023                     | 0.40     |
| rs206936   | 0.0208 | 0.668      | 0.05    | -0.009                     | 0.78     |
| rs1555543  | 0.0198 | 0.025      | 0.93    | 0.029                      | 0.29     |
| rs4929949  | 0.0183 | -0.042     | 0.88    | -0.008                     | 0.77     |
| rs2206734  | 0.0172 | -0.176     | 0.64    | -0.011                     | 0.74     |

Weight: Effect size reported in previous GWAS<sup>1,2</sup> used to weigh the SNP in the allele score. Beta (BMI): per-allele increase in BMI (kg/m<sup>2</sup>) in the Dallas Heart Study. P(BMI): SNP-association with BMI. Beta(HTGC<sup>0.3</sup>): per-allele increase in power-transformed HTGC in the Dallas Heart Study. P(HTGC): SNP-association with HTGC.

**Supplementary Table 4. Metabolic traits associated with body mass index in the Dallas Heart Study.**

| Category            | Phenotype               | N    | Spearman's rho | Partial r* | Partial r <sup>2</sup> | P-value   | Genes                       |
|---------------------|-------------------------|------|----------------|------------|------------------------|-----------|-----------------------------|
| Liver fat           | HTGC                    | 2676 | 0.43           | 0.41       | 0.17                   | 2.69E-109 | <i>PNPLA3, TM6SF2, GCKR</i> |
| Plasma lipids       | HDL                     | 4462 | -0.24          | -0.29      | 0.08                   | 1.15E-87  | <i>CETP</i>                 |
|                     | TG                      | 4462 | 0.21           | 0.22       | 0.05                   | 1.32E-51  | <i>APOA5, GCKR, LPL</i>     |
| Glycemic (non-DM)** | Fasting glucose         | 3904 | 0.24           | 0.25       | 0.06                   | 7.57E-56  | <i>GCK, G6PC2</i>           |
|                     | Fasting insulin         | 3611 | 0.59           | 0.54       | 0.29                   | 2.15E-268 |                             |
|                     | HOMA-IR                 | 3563 | 0.59           | 0.54       | 0.29                   | 2.15E-270 |                             |
|                     | HbA1c                   | 2604 | 0.25           | 0.23       | 0.05                   | 2.11E-33  |                             |
| BP                  | Systolic BP             | 4459 | 0.28           | 0.27       | 0.07                   | 6.63E-74  |                             |
|                     | Diastolic BP            | 4459 | 0.28           | 0.25       | 0.06                   | 2.81E-63  |                             |
| Biomarkers          | Leptin                  | 2929 | 0.67           | 0.74       | 0.55                   | <1E-300   | <i>LEP</i>                  |
|                     | Adiponectin             | 3354 | -0.30          | -0.29      | 0.08                   | 2.26E-66  | <i>ADIPOQ</i>               |
|                     | CRP                     | 3349 | 0.47           | 0.44       | 0.19                   | 6.53E-159 | <i>CRP</i>                  |
|                     | Uric Acid               | 4450 | 0.26           | 0.37       | 0.14                   | 3.32E-143 | <i>SLC2A9, SLC22A12</i>     |
| Sterols             | Campesterol             | 3088 | -0.22          | -0.24      | 0.06                   | 6.58E-41  | <i>ABCG5/ABCG8</i>          |
|                     | Sitosterol              | 3090 | -0.24          | -0.26      | 0.07                   | 1.67E-47  | <i>ABCG5/ABCG8</i>          |
|                     | Stigmasterol            | 3090 | -0.23          | -0.26      | 0.07                   | 2.66E-48  | <i>ABCG5/ABCG8</i>          |
|                     | 14-desmethyl Lanosterol | 3091 | -0.27          | -0.28      | 0.08                   | 3.97E-57  | <i>ABCG5/ABCG8</i>          |
|                     | Vit D3                  | 3092 | -0.26          | -0.21      | 0.05                   | 3.95E-33  | <i>GC</i>                   |

---

\* Partial correlation ( $r$ ) was obtained from linear regression models treating phenotype as a dependent variable (response), BMI as an independent variable (predictor), and adjusted for age, gender and self-reported ethnicity. Phenotype values (except for HTGC) were transformed using an inverse normal transformation to approximate a normal distribution of residuals. For HTGC, a power transformation ( $^{\wedge}0.3$ ) was used as elsewhere in the manuscript. Individuals with missing phenotype or genotype data were excluded.

\*\* Diabetics were excluded from analysis. The results obtained in the full cohort, including diabetic individuals, were not materially different.

**Supplementary Table 5. Gene x adiposity interaction on adiposity-related traits in the Dallas Heart Study.**

| Phenotype                    | Gene/locus      | SNP        | N    | Partial r (BMI) | Partial r (SNP) | Beta (BMI) | Beta (SNP) | P (Main effect) | P (Interaction) | MAF AA | MAF EA | MAF HA |
|------------------------------|-----------------|------------|------|-----------------|-----------------|------------|------------|-----------------|-----------------|--------|--------|--------|
| Leptin                       | <i>LEP</i>      | rs17151919 | 2928 | 0.74            | -0.12           | 0.08       | -0.22      | 2.28E-11        | 0.6020          | 8.3%   | 0.1%   | 0.7%   |
| CRP                          | <i>CRP</i>      | rs876537   | 3350 | 0.44            | -0.14           | 0.06       | -0.18      | 7.99E-16        | 0.3042          | 21.6%  | 40.0%  | 39.2%  |
| HTGC                         | <i>PPP1R3B</i>  | rs4240624  | 2308 | 0.42            | -0.01           | 0.06       | -0.01      | 0.7886          | 0.3824          | 19.9%  | 11.6%  | 25.4%  |
| HTGC                         | <i>LYPLAL1</i>  | rs12137855 | 2326 | 0.42            | 0.00            | 0.06       | 0.00       | 0.9627          | 0.3591          | 17.6%  | 18.8%  | 14.4%  |
| HTGC                         | <i>PNPLA3</i>   | rs738409   | 2674 | 0.41            | 0.17            | 0.06       | 0.26       | 1.73E-18        | 3.74E-05        | 14.1%  | 23.2%  | 48.2%  |
| HTGC                         | <i>TM6SF2</i>   | rs58542926 | 2675 | 0.41            | 0.10            | 0.06       | 0.29       | 3.11E-07        | 0.0058          | 3.3%   | 7.7%   | 4.2%   |
| HTGC                         | <i>GCKR</i>     | rs780094   | 2675 | 0.40            | 0.06            | 0.06       | 0.08       | 0.0032          | 4.33E-05        | 16.0%  | 41.2%  | 35.1%  |
| HTGC                         | <i>GCKR</i>     | rs1260326  | 2673 | 0.40            | 0.06            | 0.06       | 0.08       | 0.0038          | 5.47E-05        | 13.4%  | 41.9%  | 34.5%  |
| HTGC                         | <i>MBOAT7</i>   | rs641738   | 2675 | 0.40            | 0.04            | 0.06       | 0.05       | 0.0296          | 0.3467          | 32.2%  | 42.1%  | 33.7%  |
| Uric Acid                    | <i>SLC2A9</i>   | rs3775948  | 4449 | 0.38            | -0.18           | 0.04       | -0.23      | 1.31E-33        | 0.6249          | 32.4%  | 23.6%  | 33.2%  |
| Uric Acid                    | <i>SLC22A12</i> | rs505802   | 4449 | 0.37            | -0.07           | 0.04       | -0.09      | 8.38E-07        | 0.9598          | 29.6%  | 69.8%  | 43.6%  |
| HbA1c                        | <i>FN3KRP</i>   | rs1046896  | 3109 | 0.28            | 0.11            | 0.04       | 0.16       | 5.35E-10        | 0.2235          | 22.6%  | 32.1%  | 40.0%  |
| FG                           | <i>G6PC2</i>    | rs560887   | 3901 | 0.25            | -0.07           | 0.03       | -0.14      | 1.58E-05        | 0.0870          | 4.3%   | 30.5%  | 12.5%  |
| FG                           | <i>GCK</i>      | rs730497   | 3903 | 0.25            | 0.06            | 0.03       | 0.09       | 4.86E-04        | 0.9983          | 17.5%  | 18.6%  | 24.1%  |
| HbA1c                        | <i>FN3KRP</i>   | rs1046896  | 2603 | 0.24            | 0.14            | 0.03       | 0.21       | 5.66E-13        | 0.2930          | 22.1%  | 31.3%  | 41.0%  |
| TG                           | <i>LPL</i>      | rs326      | 4458 | 0.23            | -0.08           | 0.03       | -0.11      | 1.50E-07        | 0.0376          | 56.4%  | 29.9%  | 26.5%  |
| TG                           | <i>APOA5</i>    | rs3135506  | 4460 | 0.22            | 0.13            | 0.03       | 0.31       | 4.17E-17        | 0.0293          | 6.8%   | 6.1%   | 14.2%  |
| TG                           | <i>GCKR</i>     | rs780094   | 4461 | 0.22            | 0.09            | 0.03       | 0.13       | 7.24E-09        | 0.1682          | 16.2%  | 39.3%  | 33.8%  |
| TG                           | <i>GCKR</i>     | rs1260326  | 4459 | 0.22            | 0.08            | 0.03       | 0.13       | 9.52E-08        | 0.0254          | 13.2%  | 40.1%  | 33.2%  |
| Vit D3                       | <i>GC</i>       | rs4588     | 3091 | -0.22           | -0.14           | -0.03      | -0.22      | 3.08E-14        | 0.9041          | 11.2%  | 29.1%  | 20.6%  |
| Campesterol                  | <i>ABCG8</i>    | rs4245791  | 3087 | -0.24           | 0.23            | -0.03      | 0.39       | 7.10E-37        | 0.9889          | 12.8%  | 32.6%  | 17.3%  |
| Sitosterol                   | <i>ABCG8</i>    | rs4245791  | 3089 | -0.26           | 0.25            | -0.03      | 0.43       | 2.25E-44        | 0.6523          | 12.8%  | 32.7%  | 17.3%  |
| Stigmasterol<br>14-desmethyl | <i>ABCG8</i>    | rs4245791  | 3089 | -0.26           | 0.21            | -0.03      | 0.36       | 1.43E-33        | 0.8823          | 12.8%  | 32.7%  | 17.3%  |
| Lanosterol                   | <i>ABCG8</i>    | rs4245791  | 3090 | -0.28           | 0.23            | -0.04      | 0.40       | 6.39E-40        | 0.4465          | 12.8%  | 32.7%  | 17.3%  |
| HDL                          | <i>CETP</i>     | rs247616   | 4460 | -0.29           | 0.12            | -0.04      | 0.18       | 1.98E-16        | 0.1265          | 24.8%  | 33.4%  | 31.9%  |
| Adiponectin                  | <i>ADIPOQ</i>   | rs1648707  | 3353 | -0.29           | 0.10            | -0.04      | 0.13       | 1.64E-08        | 0.4425          | 45.7%  | 65.1%  | 52.4%  |

Partial r (BMI): Partial correlation between the trait and body mass index, obtained from linear regression models adjusted for age, gender and self-reported ethnicity. The traits associated with BMI are provided in descending order based of partial r (BMI). Partial r (SNP): Partial correlation between the SNP and the trait. Beta (BMI): change in standardized BMI per one unit increase in standardized trait. Beta (SNP): per-allele change in standardized trait. P(Main effect): Association of SNP with trait. P(Interaction): SNP × BMI interaction on trait. MAF: Minor allele frequencies in African Americans(AA), European Americans(EA), and Hispanic Americans(HA) in the Dallas Heart Study. Phenotype values (except for HTGC) were transformed using an inverse normal transformation to approximate a normal distribution of residuals. For HTGC, a power transformation ( $^{\wedge}0.3$ ) was used as elsewhere in the manuscript. The values were further standardized to have mean 0 and standard deviation of 1. Individuals with missing phenotype or genotype data are excluded. Beta coefficients are in sd units.



**Supplementary Table 6. Replication of gene × adiposity interactions on plasma triglyceride levels in the Dallas Biobank and Copenhagen Cohort.**

| <b>Cohort</b>     | <b>Phenotype</b> | <b>Gene/Locus</b> | <b>SNP</b> | <b>N</b> | <b>P (Main effect)</b> | <b>P (Interaction, BMI × SNP)</b> |
|-------------------|------------------|-------------------|------------|----------|------------------------|-----------------------------------|
| Dallas Biobank    | Plasma TG        | <i>GCKR</i>       | rs1260326  | 4958     | 1.25E-06               | 0.78                              |
|                   | Plasma TG        | <i>LPL</i>        | rs326      | 4958     | 6.92E-05               | 0.12                              |
| Copenhagen Cohort | Plasma TG        | <i>APOA5</i>      | rs3135506  | 4958     | 8.03E-14               | 0.52                              |
|                   | Plasma TG        | <i>GCKR</i>       | rs1260326  | 70096    | 1.83E-65               | 0.02                              |
|                   | Plasma TG        | <i>LPL</i>        | rs326      | 57549    | 1.75E-72               | 0.71                              |
|                   | Plasma TG        | <i>APOA5</i>      | rs3135506  | 64483    | 1.06E-117              | 0.18                              |

### Supplementary References.

1. Speliotes, E.K. *et al.* Association analyses of 249,796 individuals reveal 18 new loci associated with body mass index. *Nat Genet* **42**, 937-48 (2010).
2. Monda, K.L. *et al.* A meta-analysis identifies new loci associated with body mass index in individuals of African ancestry. *Nat Genet* **45**, 690-6 (2013).
3. Voorman, A., Lumley, T., McKnight, B. & Rice, K. Behavior of QQ-plots and genomic control in studies of gene-environment interaction. *PLoS One* **6**, e19416 (2011).
